# Supplementary material for: MoIV3⋯[O8Mo4]3 Lewis acid–base cluster pairs: highly efficient and stable Lewis catalysis fields frustrated in crystalline nanoclusters
Source: Royal Society of Chemistry journal article supplement (doi:10.1039/d0nr05822j), 2020-01-01
Supplement: d0nr05822j1.pdf [file d0nr05822j1.pdf]

# Supporting Information

## Mo<sup>IV</sup><sub>3</sub>...[O<sub>8</sub>Mo<sub>4</sub>]<sub>3</sub> Lewis acid-base cluster pairs: Highly efficient and stable Lewis catalysis fields frustrated in crystalline nanoclusters

Fang Yu,<sup>ab</sup> Benlong Luo,<sup>a</sup> Ruili Sang,<sup>a</sup> Li Xu<sup>\*a</sup>

<sup>a</sup>State Key Laboratory of Structural Chemistry, Fujian Institute of Research on the Structure of Matter, Chinese Academy of Sciences, Fuzhou, Fujian, 350002.

<sup>b</sup>University of Chinese Academy of Sciences, Beijing, 100049, China.

xli@fjirsm.ac.cn

### 1. Experimental Section

#### 1.1 Methods and Materials

All chemicals were obtained from commercial sources and used without further purification. Elemental analyses (C, H and N) were performed using a vario MICRO elemental analyzer. ICP-OES (Inductively Coupled Plasma Optical Emission Spectroscopy) analyses (Al, V, Mo) were carried on Ultima 2. IR spectra were recorded with a Magna 750 FTIR spectrometer photometer as KBr pellets in the 4000–400 cm<sup>-1</sup> region. Mass spectroscopic measurements were carried out on a Bruker-Impact II-UHR-TOF. The X-ray photoelectron spectroscopy (XPS) measurements were carried out on a ESCALAB 250Xi spectrometer equipped with an Al K<sub>α</sub> X-ray source. The intensity data were collected on a Bruker D8-venture diffractometer with graphite-monochromated MoK<sub>α</sub> radiation (λ = 0.71073 Å). All absorption corrections were performed using multiscan. The structures were solved by direct methods and refined by full-matrix least-squares on F<sup>2</sup> with the SHELXTL-2016 program package.

#### 1.2 Synthesis

[Mo<sup>IV</sup><sub>3</sub>O<sub>2</sub>(O<sub>2</sub>CCH<sub>3</sub>)<sub>6</sub>(H<sub>2</sub>O)<sub>3</sub>]ZnCl<sub>4</sub>·8H<sub>2</sub>O was prepared according to the published procedure.<sup>19</sup>

{H<sub>10</sub>[Al<sub>2</sub>@Mo<sub>30</sub>O<sub>80</sub>py<sub>12</sub>]}<sub>3</sub>·10C<sub>5</sub>H<sub>5</sub>N·17H<sub>2</sub>O (**1**) (H<sub>30</sub>[**1a**][**1b**][**1c**]·10C<sub>5</sub>H<sub>5</sub>N·17H<sub>2</sub>O).

[Mo<sub>3</sub>O<sub>2</sub>(O<sub>2</sub>CCH<sub>3</sub>)<sub>6</sub>(H<sub>2</sub>O)<sub>3</sub>]ZnCl<sub>4</sub>·8H<sub>2</sub>O (0.1 g, 0.1 mmol), AlCl<sub>3</sub> (0.05g, 0.04 mmol) was added into a mixture of H<sub>2</sub>O (3 mL) and pyridine (7 mL). The filtrate was sealed in a 20 mL teflonlined stainless-steel reactor and heated at 148°C for two days. The reactor was cooled to room temperature at a rate of 0.5K/min to produce black crystals of **1** (>20% yield based on Mo). IR (KBr): 1609m (py), 1450m (py), 972s (Mo<sup>VI</sup>=O), 860w (Mo<sup>VI</sup>-O-Mo), 752s [Mo<sup>IV</sup><sub>3</sub>O<sub>4</sub>]. MS(m/z, CH<sub>3</sub>CN)(simulated): [Al<sub>2</sub>@Mo<sub>30</sub>O<sub>80</sub>py<sub>9</sub>(H<sub>2</sub>O)<sub>3</sub>H<sub>8</sub>], 2493.1118 (2493.1050); [Mo<sub>30</sub>Al<sub>2</sub>O<sub>80</sub>py<sub>7</sub>(H<sub>2</sub>O)<sub>5</sub>(CH<sub>3</sub>CN)<sub>2</sub>H<sub>8</sub>]<sup>2-</sup>, 2473.1058 (2473.0998); [Mo<sub>30</sub>Al<sub>2</sub>O<sub>80</sub>py<sub>8</sub>(H<sub>2</sub>O)<sub>5</sub>(CH<sub>3</sub>CN)<sub>2</sub>H<sub>8</sub>]<sup>2-</sup>, 2512.6252 (2512.6196); MS(m/z, pyridine)(simulated): [Mo<sub>30</sub>Al<sub>2</sub>O<sub>80</sub>py<sub>9</sub>(H<sub>2</sub>O)<sub>3</sub>H<sub>8</sub>]<sup>2-</sup>, 2493.1079 (2493.1036). monoclinic, C2, a = 57.6292(15), b = 16.9770(5), c = 48.8318(13) Å, V = 43182(2) Å<sup>3</sup>, Z = 4, R1/wR2 = 9.35/30.28% for the observed data (I ≥ 2σ(I)), R1/wR2 = 9.68/30.61% for all data; CCDC-2004047.

H<sub>16</sub>[V<sub>2</sub>@Mo<sub>30</sub>O<sub>84</sub>py<sub>12</sub>][V<sub>3</sub>Mo<sub>12</sub>O<sub>42</sub>]<sub>3</sub>·10H<sub>2</sub>O·3py (**2**) (H<sub>16</sub>[**2a**][**2b**]<sub>3</sub>·10H<sub>2</sub>O·3py).

[Mo<sub>3</sub>O<sub>2</sub>(O<sub>2</sub>CCH<sub>3</sub>)<sub>6</sub>(H<sub>2</sub>O)<sub>3</sub>]ZnCl<sub>4</sub>·8H<sub>2</sub>O (0.1 g, 0.1 mmol), VO(acac)<sub>2</sub> (0.01g, 0.04 mmol) was added into a mixture of H<sub>2</sub>O (1 mL), DMF (0.5mL) and pyridine (8 mL). The resulting mixture was sealed in a 20 mL teflonlined stainless-steel reactor and heated at 140°C for two days. The reactor was cooled to room temperature at a rate of 1K/h to produce the black crystals of **2**. ICP analyses: Mo, 48.30%, V, 4.24%, the ratio of atomic number, Mo/V = 6.05; calcd. Mo/V = 66/11 = 6. IR (KBr): 3484m (H<sub>2</sub>O), 3071m (py), 1607m (py), 1448m (py), 947m (M<sup>I</sup>=O), 872vs (M-O-Mo), 756s ([Mo<sup>IV</sup><sub>3</sub>O<sub>4</sub>]). cubic, Fm $\bar{3}$ m, a = 42.3973(18) Å, V = 76211(9) Å<sup>3</sup>, Z = 8, R1/wR2 = 5.88/17.57% for the observed data (I ≥ 2σ(I)), R1/wR2 = 6.81/18.86% for all data; CCDC-2004115.

H<sub>12</sub>[Mo<sub>2</sub>@Mo<sub>30</sub>O<sub>84</sub>py<sub>12</sub>][Ge<sub>2</sub>Mo<sub>13</sub>O<sub>41</sub>(OH)<sub>2</sub>]<sub>3</sub> (**3**) (H<sub>12</sub>[**3a**][**3b**]<sub>3</sub>).

[Mo<sub>3</sub>O<sub>2</sub>(O<sub>2</sub>CCH<sub>3</sub>)<sub>6</sub>(H<sub>2</sub>O)<sub>3</sub>]ZnCl<sub>4</sub>·8H<sub>2</sub>O (0.1 g, 0.1 mmol), GeO<sub>2</sub> (0.0117 g, 0.112 mmol) and HOCH<sub>2</sub>CO<sub>2</sub>H (0.012 g, 0.158 mmol) was added into a mixture of H<sub>2</sub>O (2 mL), DMF (0.5mL) and pyridine (8 mL). The resulting mixture was sealed in a 20 mL teflonlined stainless-steel reactor and heated at 140°C for two days. The reactor was cooled to room temperature at a rate of 1K/h to produce black crystals of **3**. cubic, Fm $\bar{3}$ m, a = 42.593(2) Å, V = 77270(11) Å<sup>3</sup>, Z = 8, R1/wR2 = 5.55/13.30% for the observed data (I ≥ 2σ(I)), R1/wR2 = 8.14/14.97% for all data; CCDC-2004116.

## 2. Structures

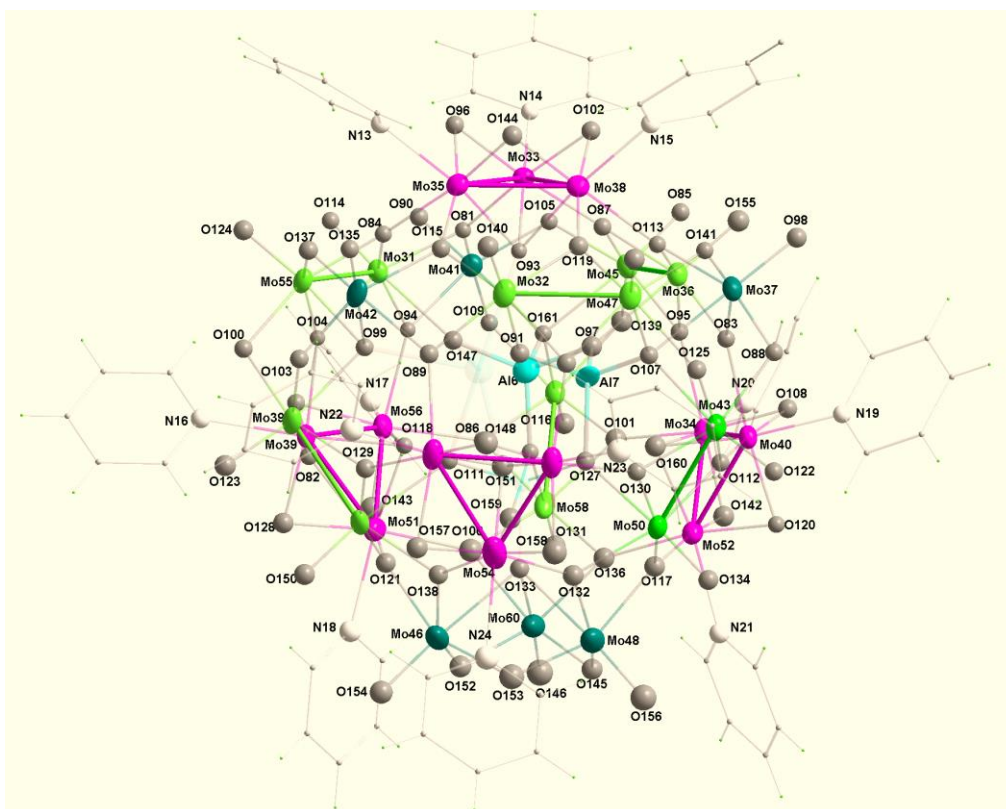

**Fig. S1** Atomically labeled structure of  $[H_4Al_2@Mo_{30}O_{80}py_{12}]^{6-}$  (**1a**) with 50% (Al), 30% (Mo) and 20% (O, N) probability thermal ellipsoids (Mo<sup>IV</sup>, purple; Mo<sup>V</sup>, green; Mo<sup>VI</sup>, black green, Al<sup>3+</sup>, aqua; O, N, grey).

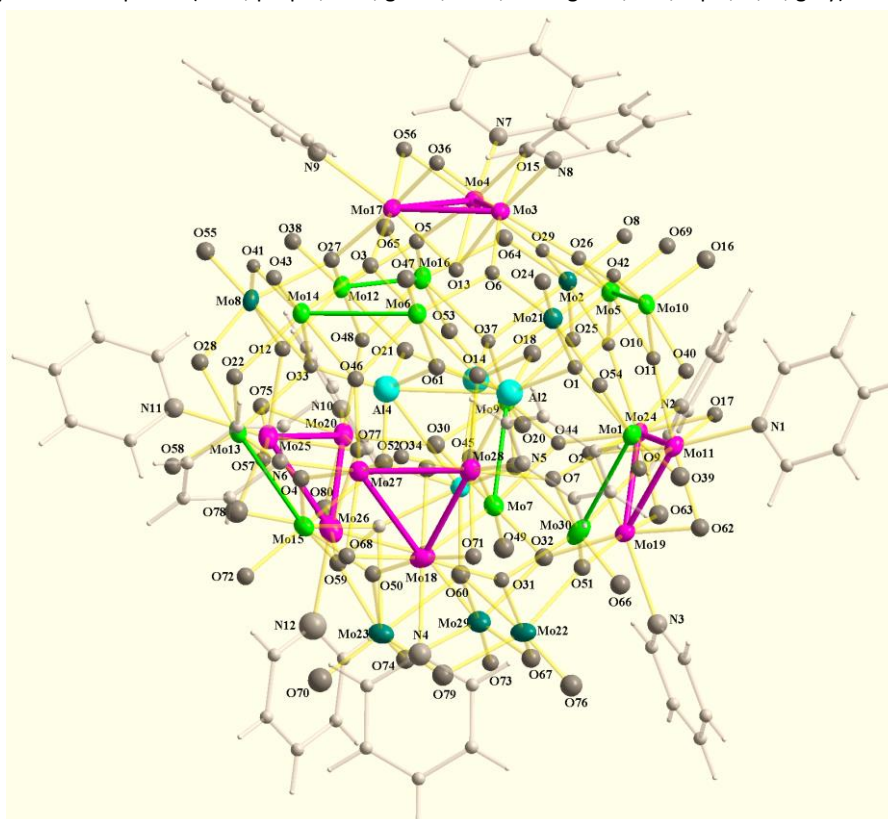

**Fig. S2** Atomically labeled Structure of  $[H_4Al_2@Mo_{30}O_{80}py_{12}]^{6-}$  (**1b**) with 50% (Al), 30% (Mo) and 20% (O, N) probability thermal ellipsoids (Mo<sup>IV</sup>, purple; Mo<sup>V</sup>, green; Mo<sup>VI</sup>, black green, Al<sup>3+</sup>, aqua; O, N, grey). Al $\cdots$ Al, 2.902(1) Å.

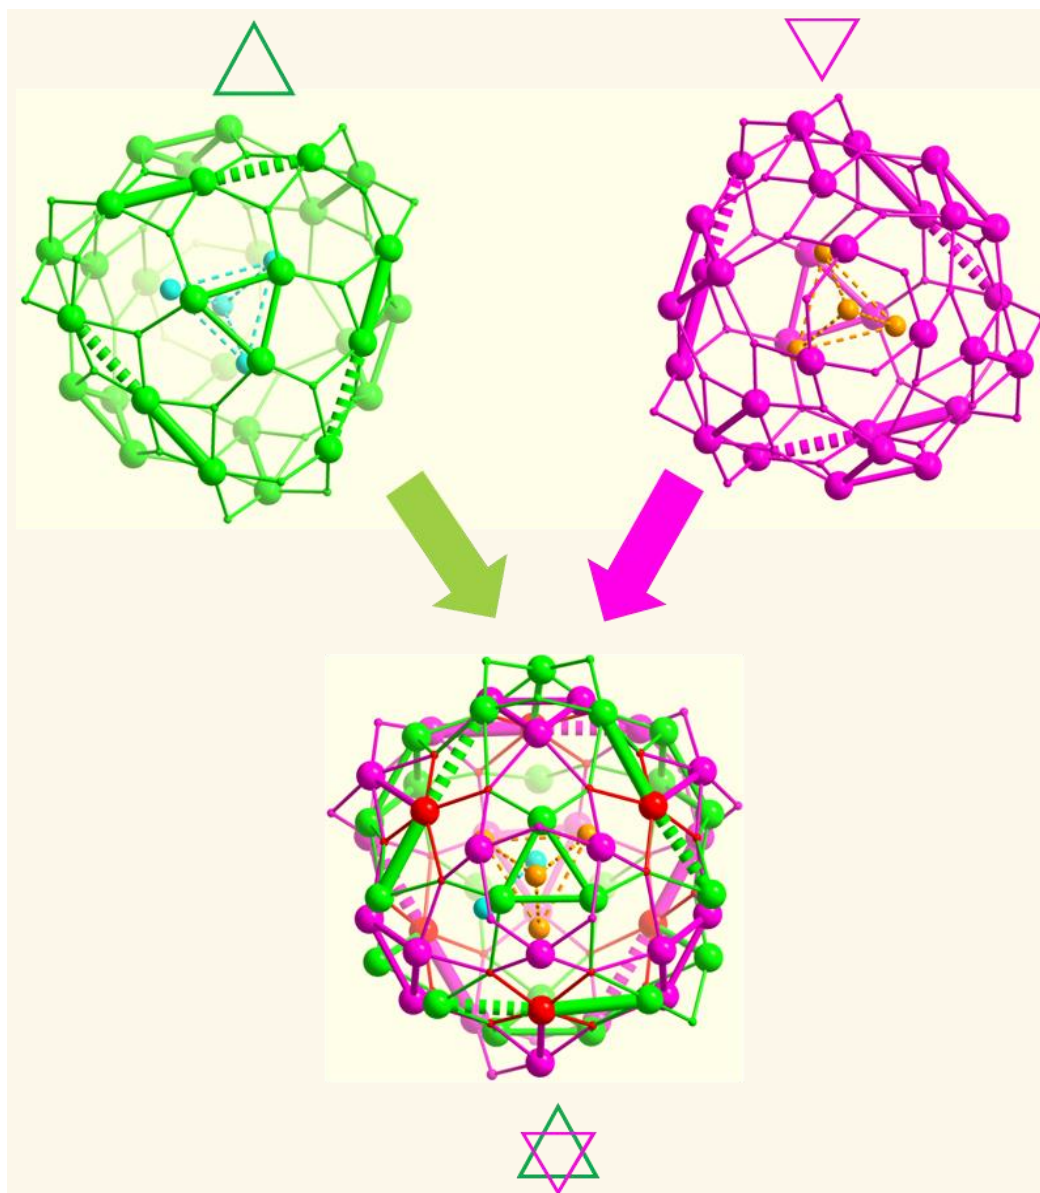

**Fig. S3** Seriously disordered structure of  $[\text{Al}_2@\text{Mo}_{30}\text{O}_{80}\text{py}_{12}]$  (**1c**) formed through a reverse alternative arrangement of **1a** and **1b**.

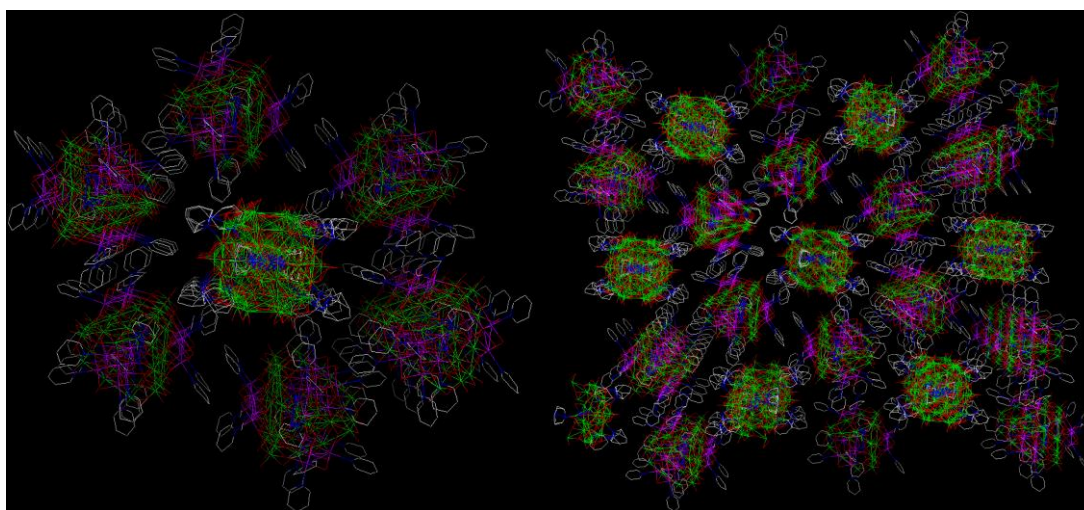

**Fig. S4** Crystal packing diagram of **1** showing neighboring arrangement of  $[\text{Mo}^{\text{IV}}_3\text{py}_3](\text{Mo}^{\text{IV}}_3, \text{purple triangle})$ .

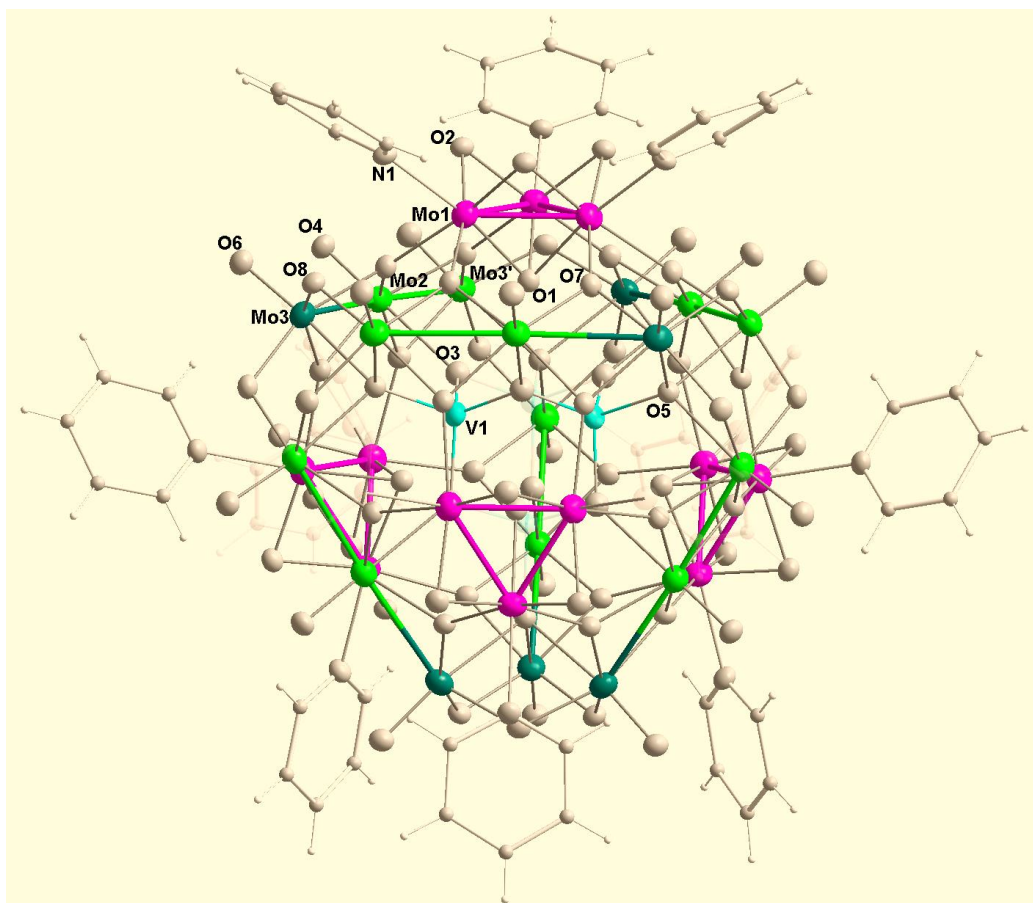

**Fig. S5** Atomically labeled structure of  $[V_2@Mo_{30}O_{80}py_{12}]$  (**2a**) with 30% (V, Mo) and 20% (O, N) probability thermal ellipsoids ( $Mo^{IV}$ , purple;  $V^{IV}$ , aqua;  $Mo^V$ ,  $Mo^{VI}$ , green and black green, O, N, grey). Selected bond lengths: Mo1-Mo1, 2.492(2); Mo2-Mo3, 2.846 (2), V1...V1', 2.779(2) Å.

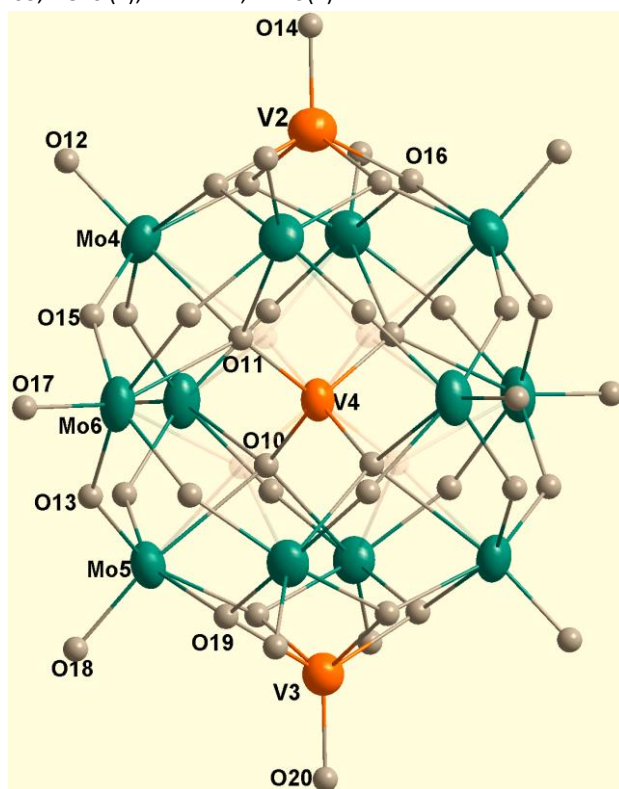

**Fig. S6** Atomically labeled structure of  $[V_3Mo_{12}O_{42}]$  (**2b**) with 30% (V, Mo) and 20% probability thermal ellipsoids ( $Mo^{VI}$ , black green, O, N, grey).



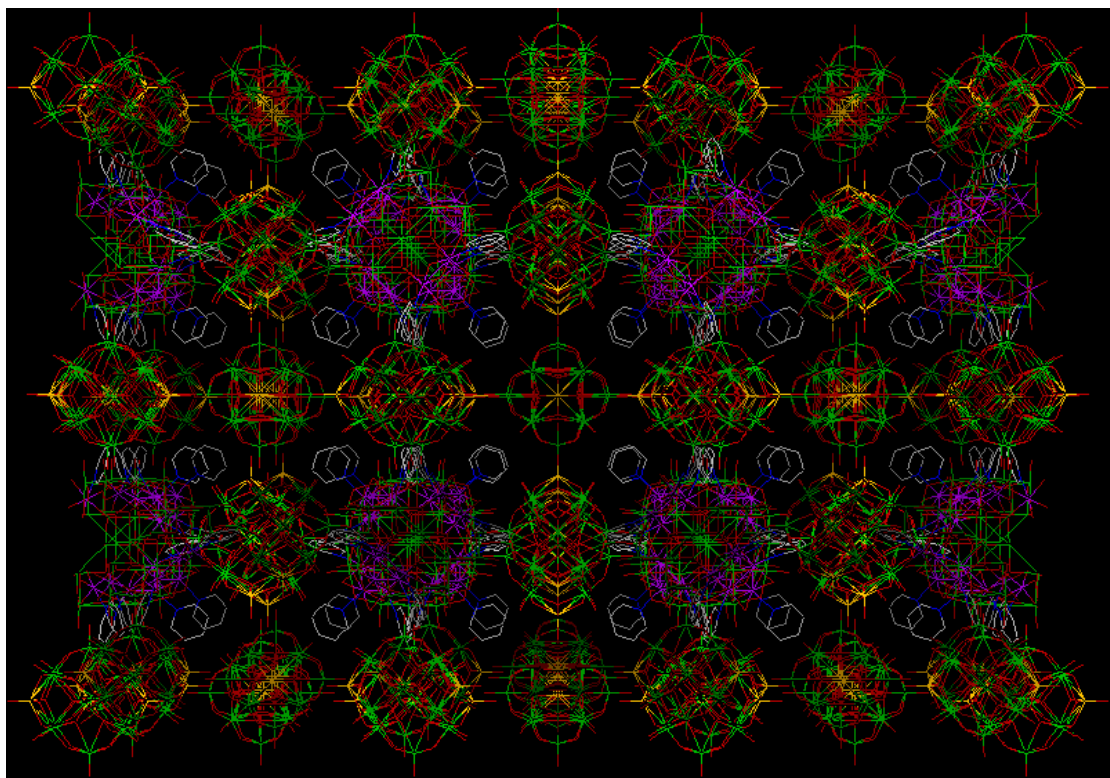

**Fig. S7** Crystal packing diagram of **2** showing each **2a** and surrounding twelve **2b**.

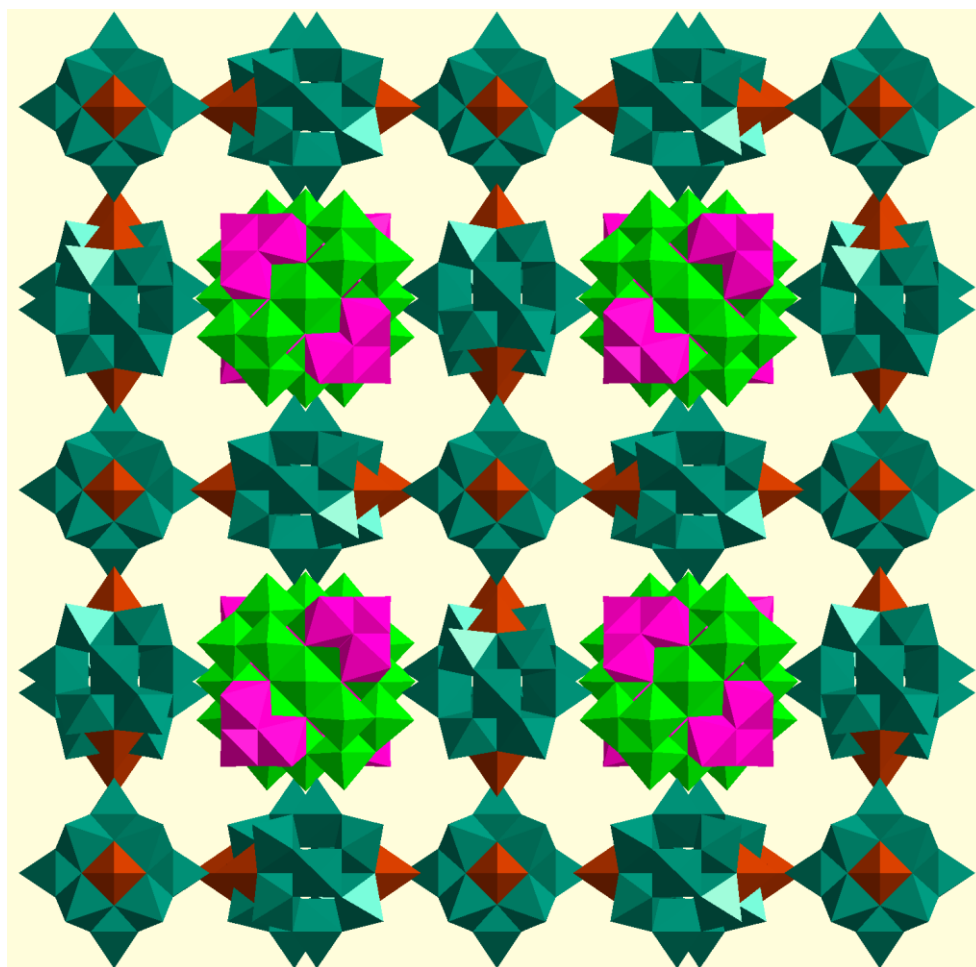

**Fig. S8** Polyhedral presentation of crystal packing diagram of **2** showing each **2a** and surrounding twelve **2b**.

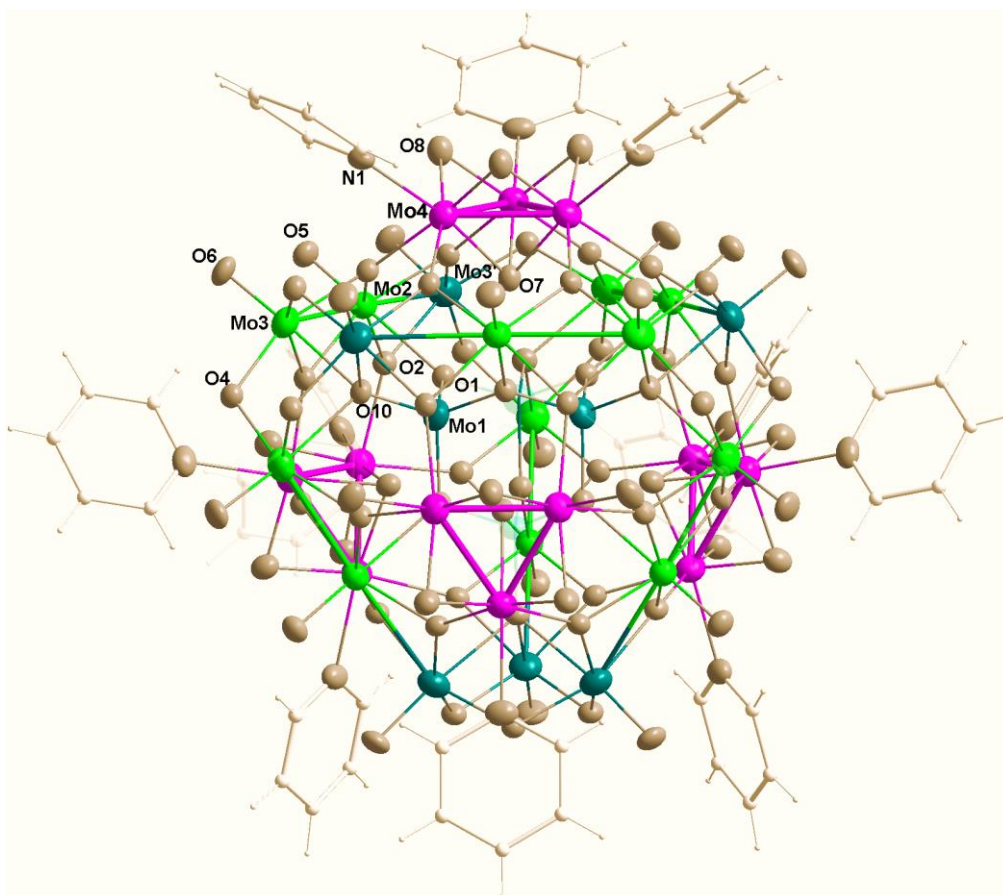

**Fig. S9** Atomically labeled structure of  $[\text{Mo}_2@ \text{Mo}_{30}\text{O}_{80}\text{py}_{12}]$  (**3a**) with 30% (Mo) and 20% (O, N) probability thermal ellipsoids ( $\text{Mo}^{\text{IV}}$ , purple;  $\text{Mo}^{\text{V}}$ ,  $\text{Mo}^{\text{VI}}$ , green and black green, O, N, grey). Selected bond lengths: Mo4-Mo4, 2.497(2); Mo2-Mo3, 2.8541 (15), Mo1...Mo1', 2.942(7) Å.

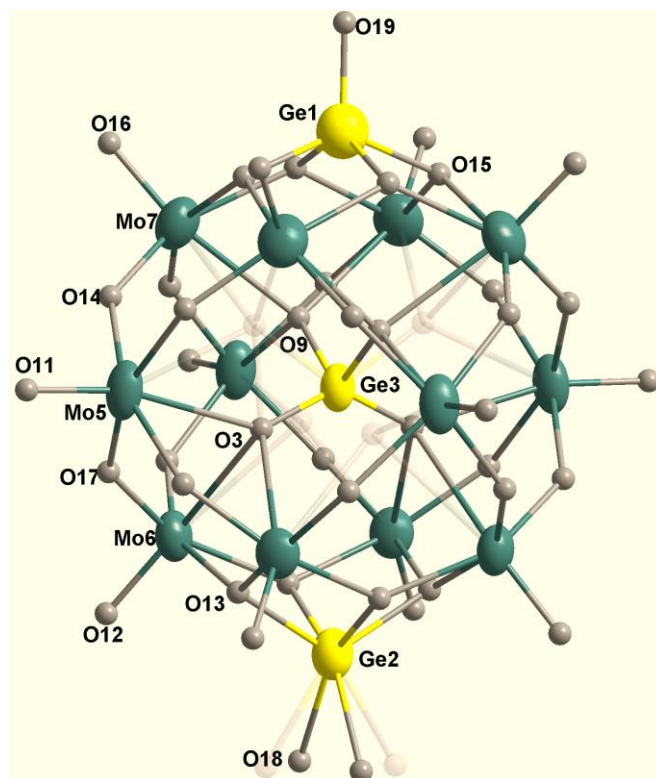

**Fig. S10** Atomically labeled structure of  $[\text{Ge}_3\text{Mo}_{12}\text{O}_{43}]$  (**3b**) with 30% (Ge, Mo) probability thermal ellipsoids ( $\text{Ge}^{\text{IV}}$ , yellow;  $\text{Mo}^{\text{VI}}$ , black green; O, grey).

### 3. XPS spectra

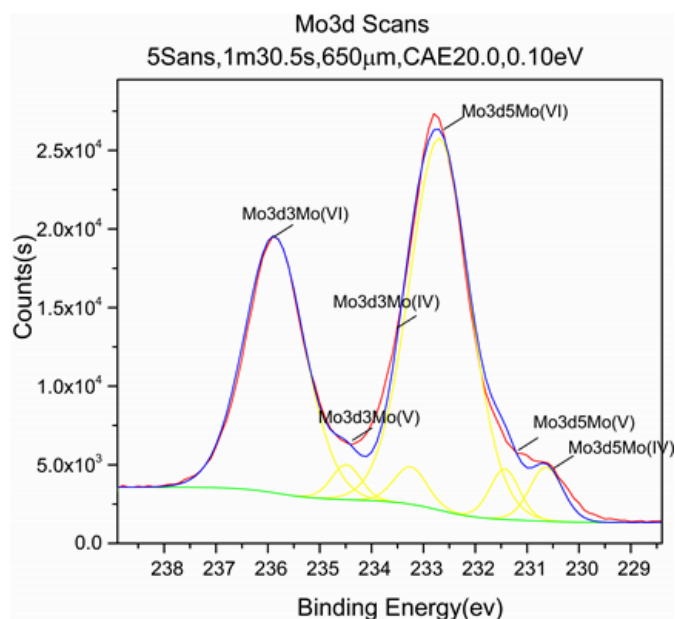

**Fig. S11** XPS of **2**.

Binding energies of Mo 3d from the literatures<sup>20, 22</sup> and the binding energies of peaks used to assign species from the present measurements of **2** (C1S calibrated to 284.8ev for contrast).

A comparison of Mo<sup>IV,V,VI</sup> binding energies in **2** and related compounds

| Oxidation state                                             | Mo 3d <sub>5/2</sub> (eV) | Mo 3d <sub>3/2</sub> (eV) |
|-------------------------------------------------------------|---------------------------|---------------------------|
| <b>Mo(IV)-MoO(OH)<sub>2</sub></b>                           | 230.2                     | 233.4                     |
| <b>Mo(V)-MoCl<sub>5</sub></b>                               | 230.9-231.1               | 234.3-235.4               |
| <b>Mo(VI)-Na<sub>2</sub>MoO<sub>4</sub>·2H<sub>2</sub>O</b> | 231.9-232.3               | 235-235.4                 |
| Mo(IV)- <b>2</b>                                            | 230.52                    | 233.57                    |
| Mo(V)- <b>2</b>                                             | 231.21                    | 234.26                    |
| Mo(VI)- <b>2</b>                                            | 232.74                    | 235.89                    |
| Mo(IV)- <b>10</b> <sup>22</sup>                             | 230.11                    | 233.27                    |
| Mo(V)- <b>10</b> <sup>22</sup>                              | 231.63                    | 234.74                    |
| Mo(VI)- <b>10</b> <sup>22</sup>                             | 232.11                    | 235.46                    |
| Mo(IV)- <b>9</b> <sup>20</sup>                              | 229.12                    | 232.28                    |
| Mo(V)- <b>9</b> <sup>20</sup>                               | 230.26                    | 233.30                    |
| Mo(VI)- <b>9</b> <sup>20</sup>                              | 231.14                    | 234.20                    |

H<sub>4</sub>[Mo<sup>IV</sup><sub>6</sub>Mo<sup>V</sup><sub>6</sub>Mo<sup>VI</sup><sub>9</sub>O<sub>54</sub>(OH)<sub>4</sub>py<sub>6</sub>] (**10**),<sup>22</sup> Na[Mo<sup>IV</sup><sub>12</sub>Mo<sup>V</sup><sub>4</sub>Mo<sup>VI</sup><sub>3</sub>O<sub>43</sub>(OH)py<sub>12</sub>] (**9**)<sup>20</sup>

### 4. IR spectra

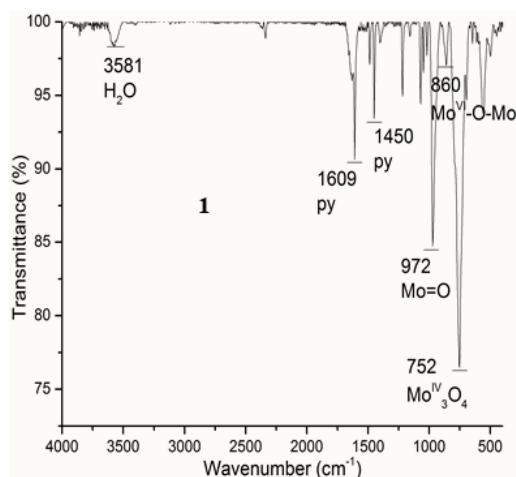

**Fig. S12** IR spectrum of **1**.

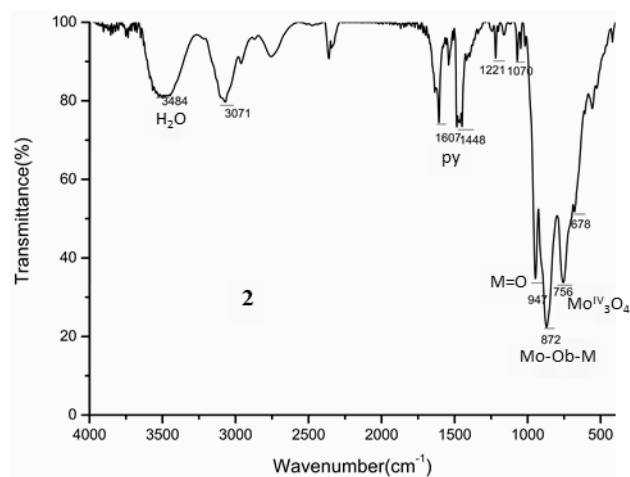

Fig. S13 IR spectra of 2.

## 5. Characterization data of the isolated products.

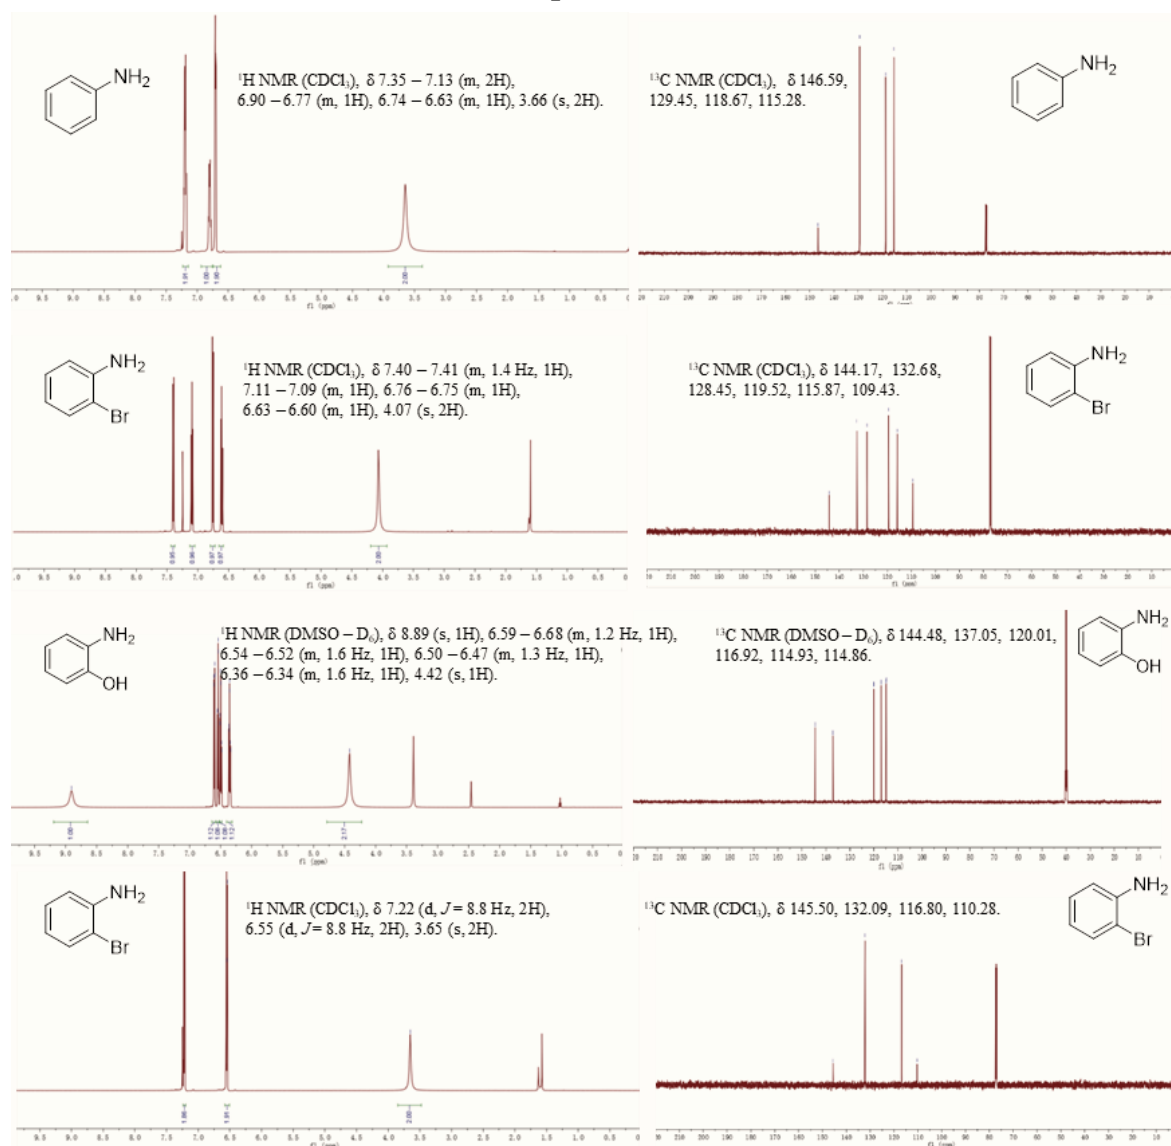



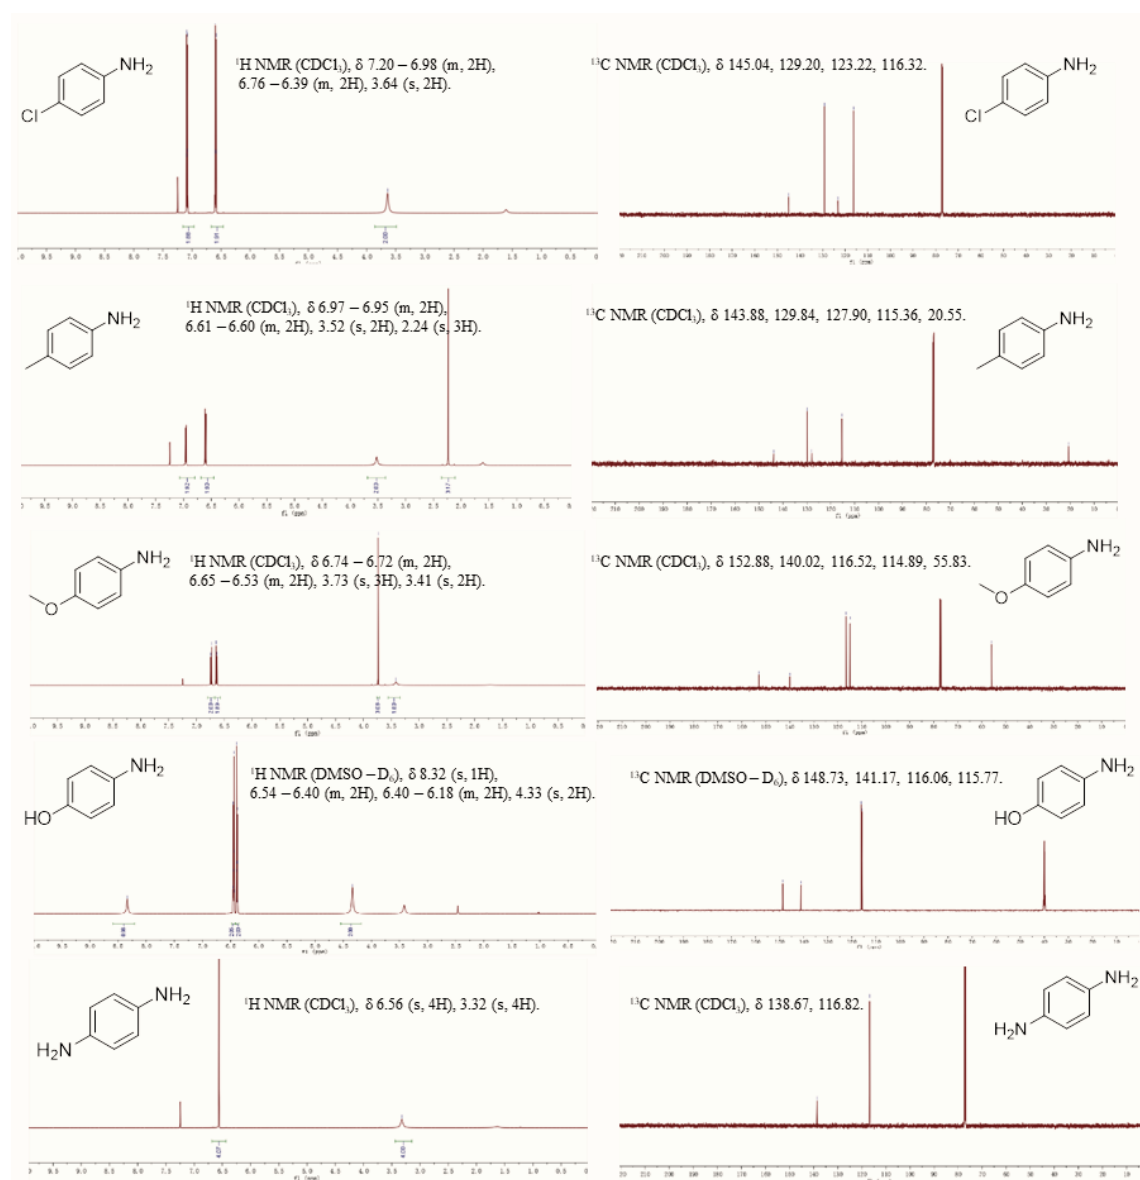

**Fig. S14.**  $^1\text{H}$  NMR (600Hz) and  $^{13}\text{C}$  NMR(151Hz) of the isolated products.

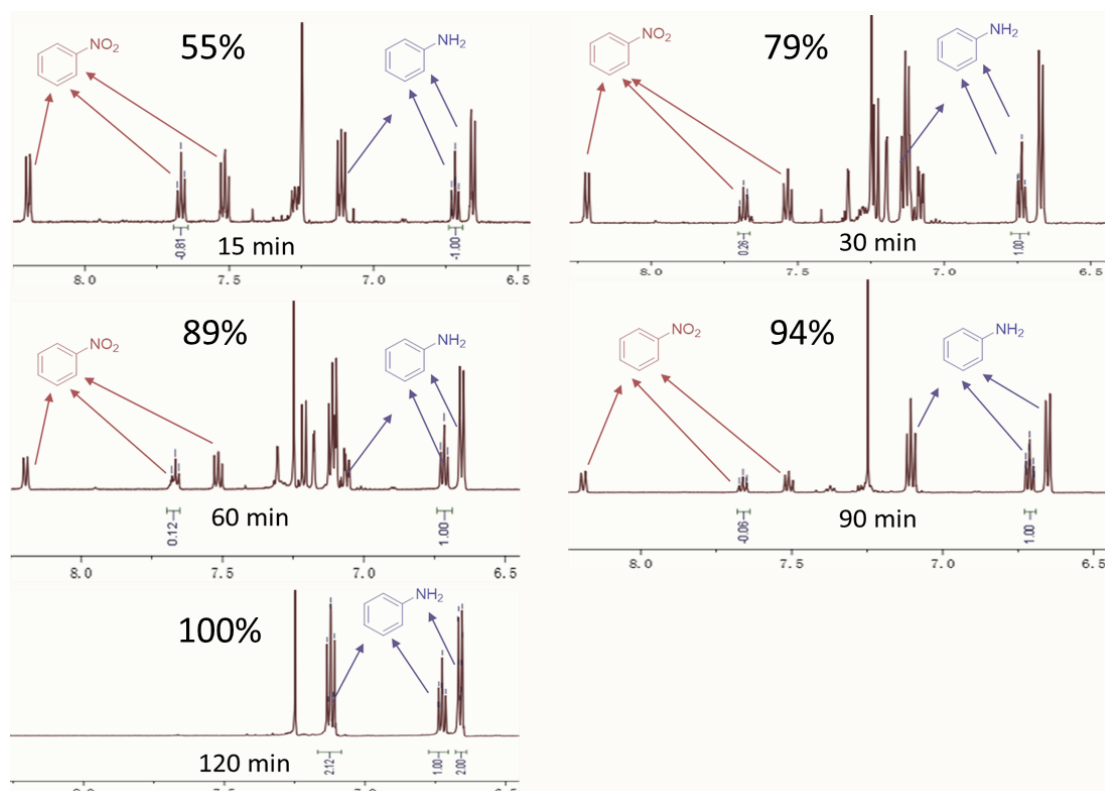

**Fig. S15**  $^1\text{H}$  NMR spectra for hydrazine reduction of nitrobenzene to aniline catalysed by **2** at different reaction time. reaction conditions: **2**, 3 mol%,  $\text{PhNO}_2$ , 10  $\mu\text{L}$ , 0.097 mmol,  $\text{N}_2\text{H}_4\cdot\text{H}_2\text{O}$ , 20  $\mu\text{L}$ , 0.3 mmol, EtOH, 2 mL,  $80^\circ\text{C}$ .

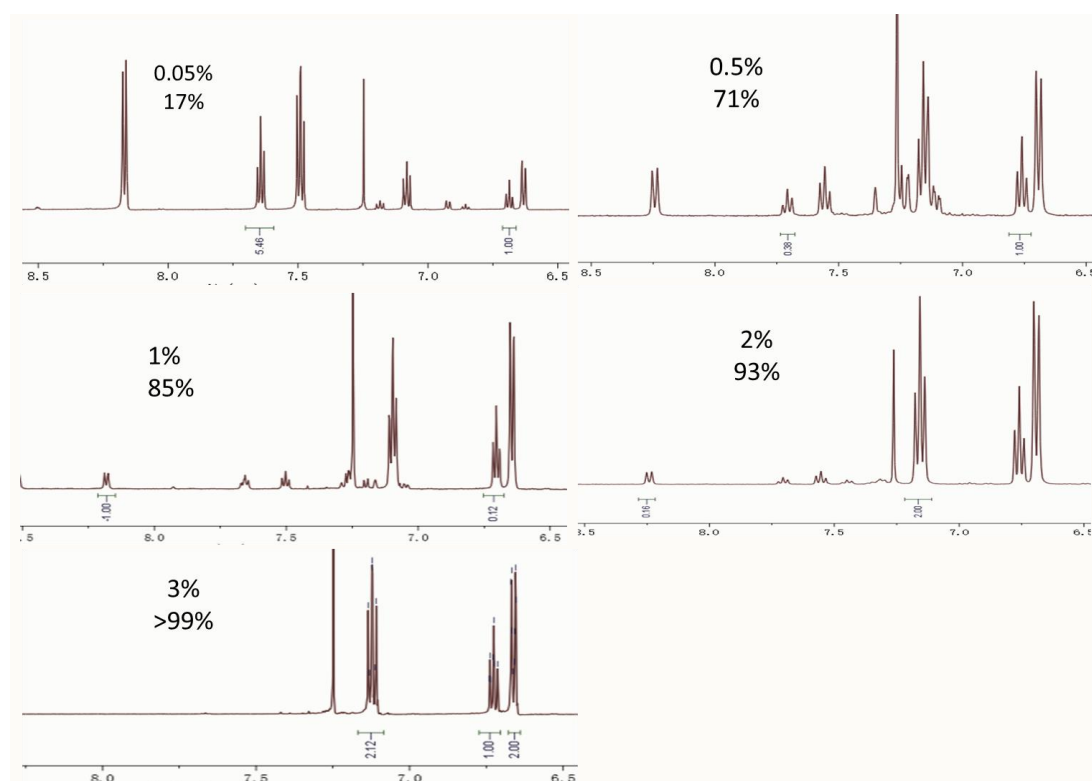

**Fig. S16.**  $^1\text{H}$  NMR spectra of products for **2** (0.05-3 mol%) to catalyse hydrazine hydrogenation of nitrobenzene to aniline. reaction conditions:  $\text{PhNO}_2$ , 10  $\mu\text{L}$ , 0.097 mmol,  $\text{N}_2\text{H}_4\cdot\text{H}_2\text{O}$ , 20  $\mu\text{L}$ , 0.3 mmol, EtOH, 2 mL, 2h,  $80^\circ\text{C}$ .



## 6. Tables

Table S1 Bond valance sum (BVS) calculation of **2** and **3**.<sup>a</sup>

|            |                   |           |           |                |                |
|------------|-------------------|-----------|-----------|----------------|----------------|
| V1 4.252   | V2 4.347          | V3 4.528  | Mo1 4.315 | Mo2 5.229      | Mo3 5.560      |
| Mo4 6.198  | Mo5 6.129         | Mo6 5.910 | O1 2.289  | O2 1.795       | O3 0.278/2.598 |
| O4 2.003   | O5 1.926/1.155x2  | O6 1.759  | O7 2.088  | O8 1.834       | O9 1.970       |
| O10 2.178  | O11 2.058         | O12 1.934 | O13 2.163 | O14 1.827      | O15 2.288      |
| O16 2.048  | O17 1.939         | O18 1.862 | O19 2.097 | O20 1.1981     |                |
| Ge1 4.636  | Ge2 3.499         | Ge3 4.754 | Mo1 5.948 | Mo2 4.930      | Mo3 5.494      |
| Mo4 4.458  | Mo5 6.006         | Mo6 6.478 | Mo7 5.981 | O1 1.757/0.281 | O2 2.035       |
| O3 1.927   | O4 1.839          | O5 1.750  | O6 1.778  | O7 2.451       | O8 1.874       |
| O9 1.988   | O10 2.621/1.101x2 |           | O11 1.918 | O12 2.041      | O13 2.246      |
| O14 2.214  | O15 2.113         | O16 1.987 | O17 2.236 | O18 0.454      | O19 1.235      |
| O20 1.1981 |                   |           |           |                |                |

<sup>a</sup>Oxygen atoms with the BVS values below 1.2 are assigned as OH<sup>-</sup> or H<sub>2</sub>O marked in red.
